# Supplementary material
Source: PubMed Central journal article supplement (PMC2947398)

**Figure S1. TFPI immunoreactivity is decreased in blood from TFPI<sup>Tie2</sup> mice compared with TFPI<sup>Flox</sup>. \*p<0.01**

**Figure S2. Plasma TFPI activities.**

**TFPI activities were measured in plasma from mice that contain a “floxed” TFPI-K1 domain and either don’t express Cre recombinase (TFPI<sup>Flox</sup>) or express the Cre recombinase via the endothelial specific promoter for Tie2 (TFPI<sup>Tie2</sup>) following seven backcrosses into the C57BL/6 background. \* P<0.0001.**

**Figure S3. Serial dilution of TF (Innovin) does not reveal a major effect on plasma clotting times. Plasma samples were incubated with serial dilutions of TF (1:200, 1:400, 1:800, 1:1600 and 1:3200) for two minutes at 37°C prior to the addition of CaCl<sub>2</sub> to initiate clotting. Clotting times between TFPI<sup>Flox</sup> and TFPI<sup>Tie2</sup> mice did not differ significantly at any concentration of TF.**

Figure S1

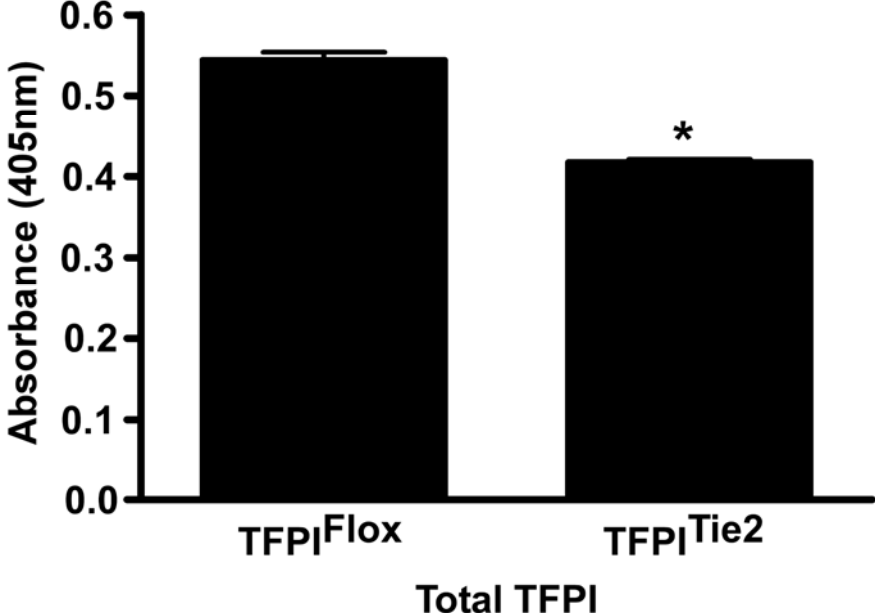

Figure S2

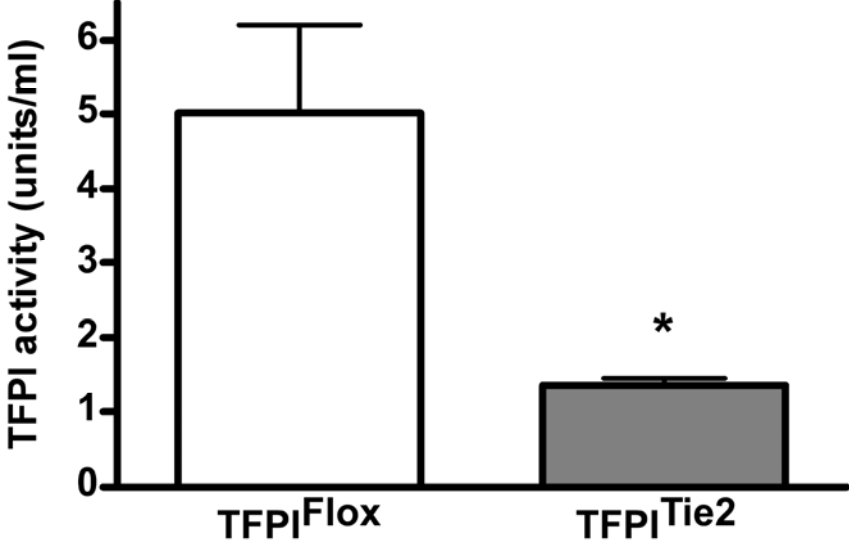

Figure S3

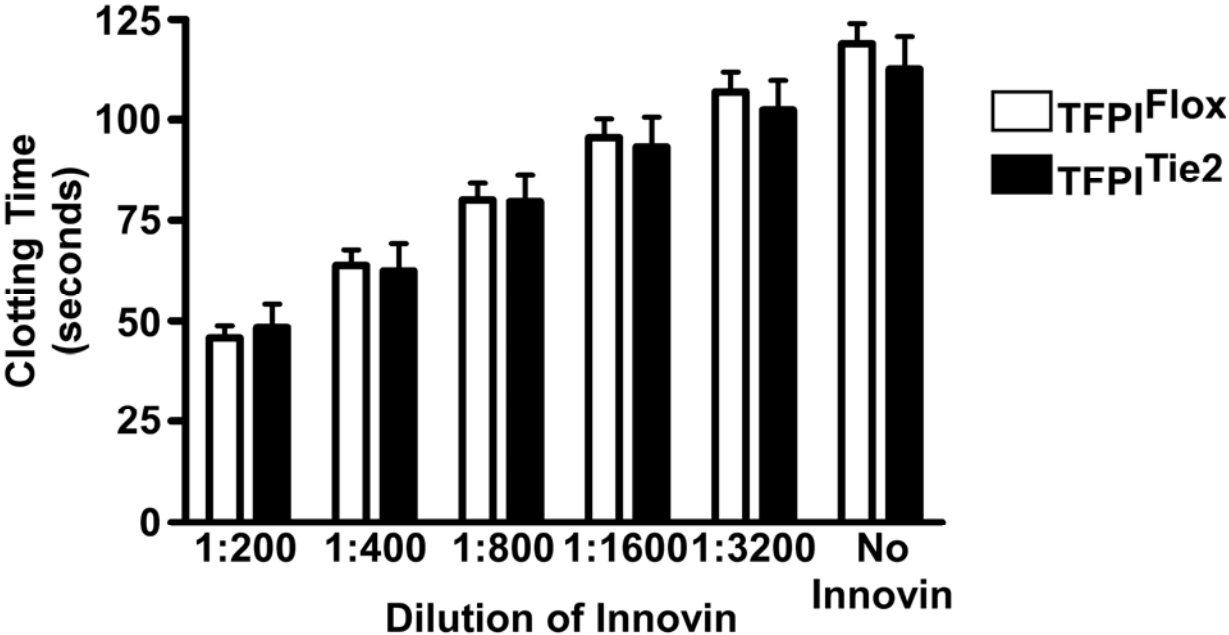

Supplement: blood-2009-10-250910_1.pdf [file blood-2009-10-250910_1.pdf]
